# Supplementary material for: Common Variants in CDKN2B-AS1 Associated with Optic-Nerve Vulnerability of Glaucoma Identified by Genome-Wide Association Studies in Japanese
Source: PLOS journal article supplement (doi:10.1371/journal.pone.0033389), 2012-03-12

Figure S1

**A**

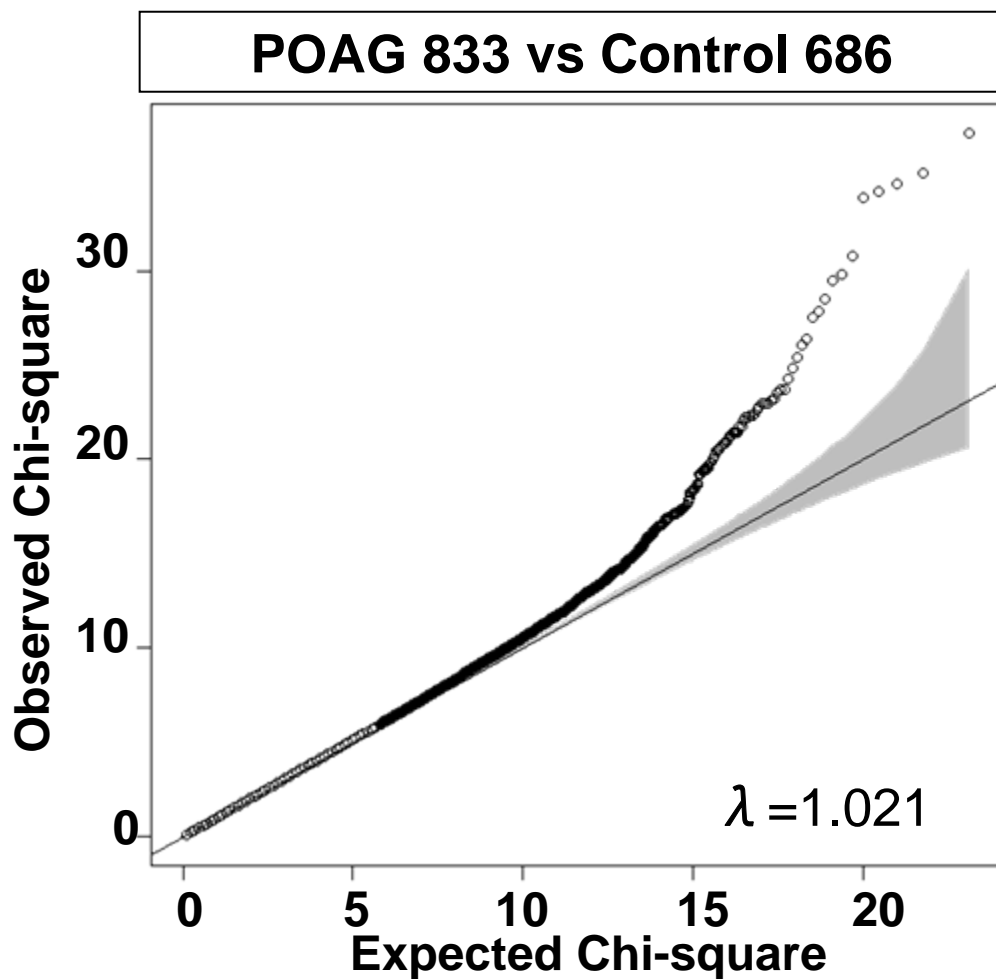

**B**

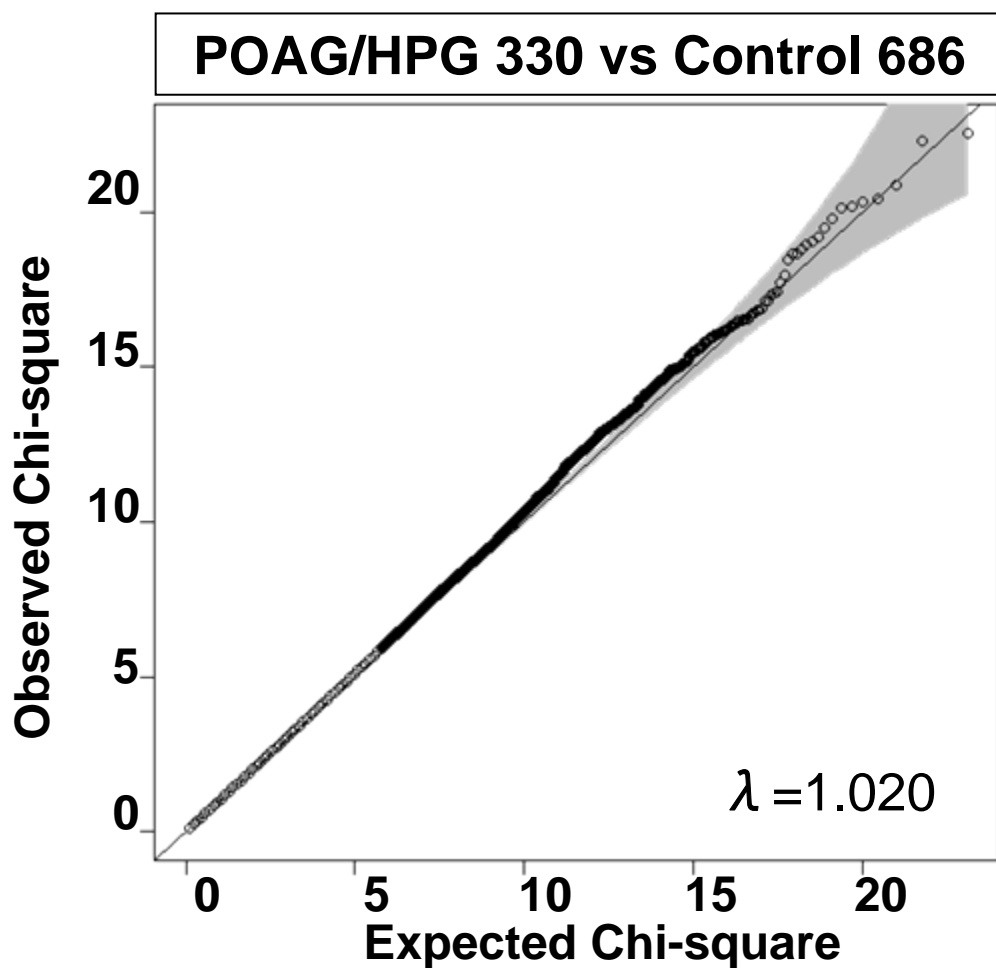

C

POAG/NPG 503 vs Control 686

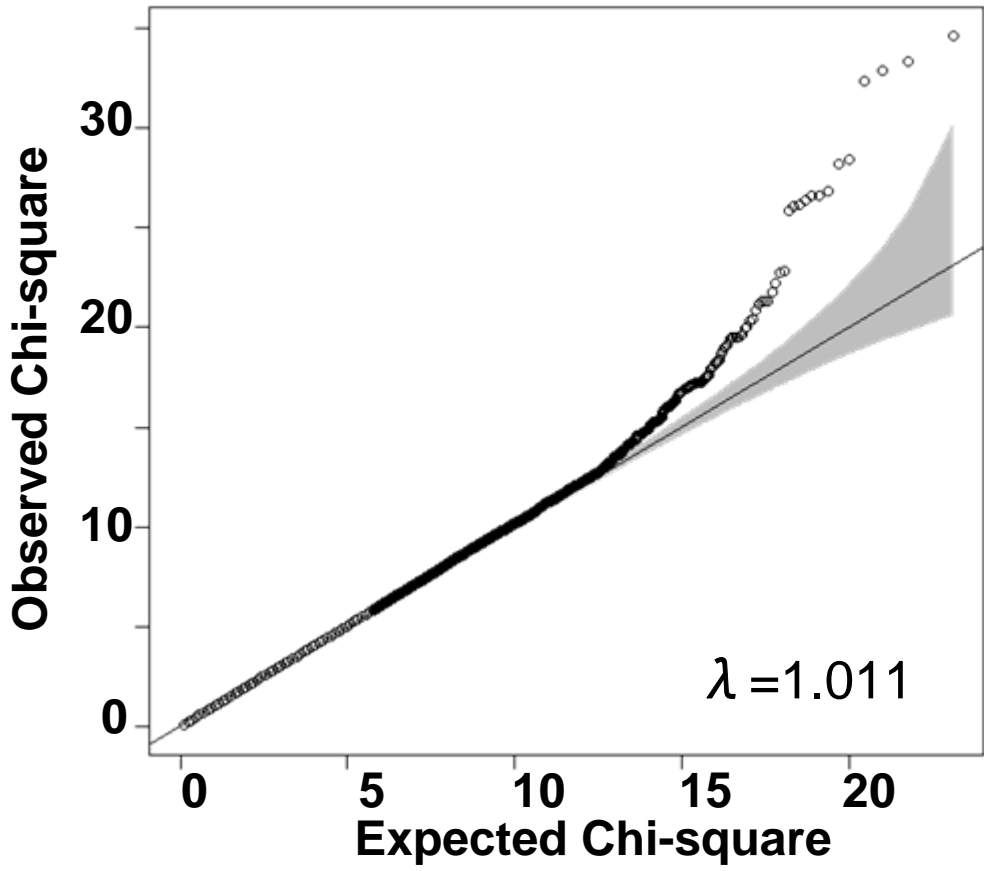

Supplement: S1 (10.1371/journal.pone.0033389.s001) [file journal.pone.0033389.s001]
